# Supplementary material
Source: publisher figshare collection journal article supplement (https://karger.figshare.com/ndownloader/files/25161020)
Supplement: Supplementary file 1 [file 25161020]

**Online appendix** ERAS compliance

|  | **All patients**  (n = 195) | **Crohn’s disease**  (n = 42) | **Adeno-carcinoma**  (n = 153) | ***P*-value** |
| --- | --- | --- | --- | --- |
| Preadmission information | 165 (85) | 38 (90) | 127 (83) | 0.335 |
| Carbohydrate drinks | 162 (84) | 36 (86) | 126 (83) | 0.816 |
| No oral bowel preparation  No premedication  Antibiotic prophylaxis | 194 (99)  190 (97)  195 (100) | 42 (100)  41 (98)  42 (100) | 152 (99)  149 (97)  153 (100) | 1.000  1.000  1.000 |
| Thrombo-prophylaxis | 188 (96) | 42 (100) | 146 (95) | 0.350 |
| PONV prophylaxis | 177 (91) | 42 (100) | 135 (88) | 1.000 |
| Intraoperative EDA  Active warming | 54 (28)  193 (99) | 6 (14)  42 (100) | 48 (31)  151 (99) | **0.032**  1.000 |
| Intraoperative IV fluids < 2L  Fluid administration guidance | 142 (73)  82/192 (43) | 34 (81)  13 (31) | 108 (71)  69/150 (46) | 0.240  0.112 |
| No prophylactic NGT | 181 (93) | 41 (98) | 140 (92) | 0.309 |
| No abdominal drain  Strong opioids within 48 hours  Systematic laxatives  IV fluids lock at 48 hours | 185 (95)  16/54 (30)  182 (93)  152 (78) | 40 (95)  6/7 (85)  40 (95)  34 (81) | 145 (95)  10/47 (21)  142 (93)  118 (77) | 1.000  **0.002**  0.441  0.678 |
| Energy (ONS) at POD 0 >300 kcal | 46/172 (27) | 13/36 (36) | 33/136 (24) | 0.203 |
| Total oral fluids at POD 0 > 800 mL | 84/165 (51) | 18/33 (55) | 66/132 (50) | 0.699 |
| Mobilization at all at POD 0 | 83 (43) | 23 (55) | 60 (40) | 0.101 |
| Removal Foley within 48 hours  Mobilization > 6 hours at POD 1  Termination EDA at POD 2 | 136/181 (75)  64/160 (40)  36/54 (67) | 32/38 (84)  11/29 (38)  4/6 (67) | 104/143 (73)  53/131 (40)  32/48 (67) | 0.205  0.837  1.000 |

Compliance to specific pre-, intra- and postoperative ERAS parameters of patients with Crohn’s disease (n=42) and patients with adenocarcinoma (n=153) undergoing ileocecal resection or right colectomy. ERAS – enhanced recovery after surgery, PONV – postoperative nausea and vomiting, EDA – epidural anaesthesia, NGT – nasogastric tube, ONS – oral nutritional supplements, POD – postoperative day.

Bold P-values indicate statistical significance (p< 0.05).
